# Supplementary material for: Therapeutic Potential of Super Activated Platelet Lysate (sPL) and Umbilical Cord Mesenchymal Stem Cells (UCMSCs) in Enhancing Endometrial Regeneration in Rats with Thin Endometrium
Source: Research Square preprint supplement (doi:10.21203/rs.3.rs-5870571/v1), 2025-04-04
Supplement: Supplementary file 1 [file 2a386eca84eea817656d2dc3.pdf]

# **Therapeutic Potential of Super Activated Platelet Lysate (sPL) and Umbilical Cord Mesenchymal Stem Cells (UCMSCs) in Enhancing Endometrial Regeneration in Rats with Thin Endometrium**

Ling-Qi Meng<sup>1†</sup>, Yi Zhang<sup>2†</sup>, Chun-Xiang Liu<sup>1</sup>, Ihsan Ullah<sup>1</sup>, Tian-Qi Zhang<sup>1</sup>, Yi Zhang<sup>1\*</sup>

<sup>1</sup> National and Local Joint Stem Cell Research and Engineering Center for Aging Diseases, Tian Qing Stem Cell Co. Ltd., 150028 Harbin, Heilongjiang, China

<sup>2</sup> Laboratory of Basic and Application Research of Bei yao (Heilongjiang University of Chinese Medicine), Ministry of Education, 24 Heping Road, 150040 Harbin, Heilongjiang, China

<sup>†</sup>These authors contributed equally to this work.

\*Correspondence: Yi Zhang, PhD, Professorial senior engineer, [neo\\_yi\\_zhang@163.com](mailto:neo_yi_zhang@163.com). ORCID: 0000-0002-4012-8258.

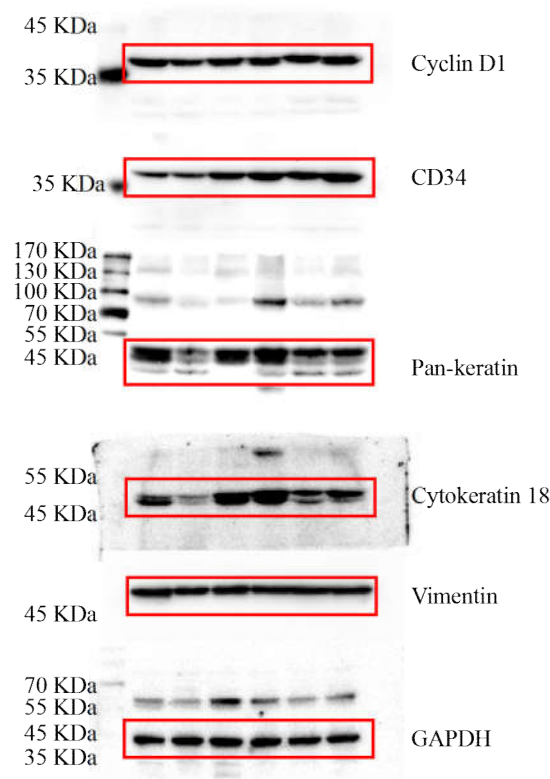

Fig. S1 Full size images of the Western Blot
